# Supplementary material
Source: PubMed Central journal article supplement (PMC11028251)
Supplement: 262_2018_2216_MOESM1_ESM.pdf [file 262_2018_2216_MOESM1_ESM.pdf]

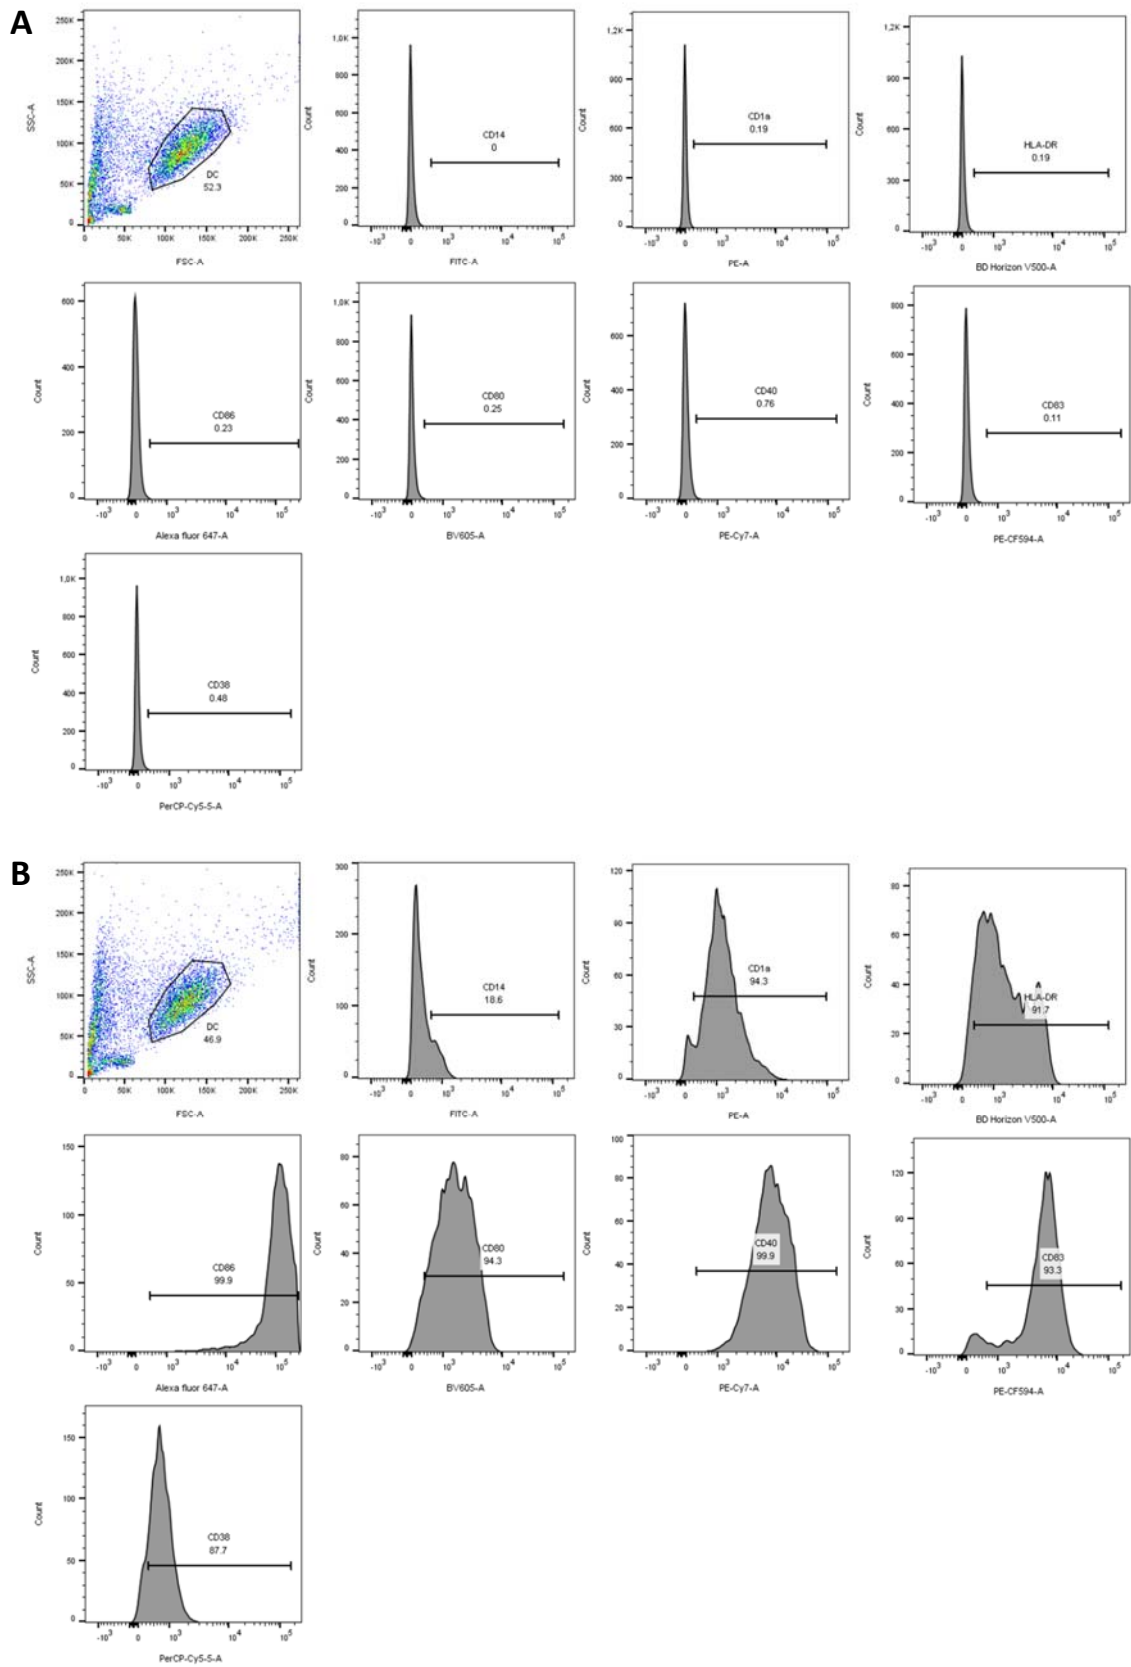

Supplementary figure 1: Representative gating strategy for phenotyping of DC. DC were gated on according to their scatter properties. A) Unstained samples were used to set the gates for the respective markers. B) Stained DC population.

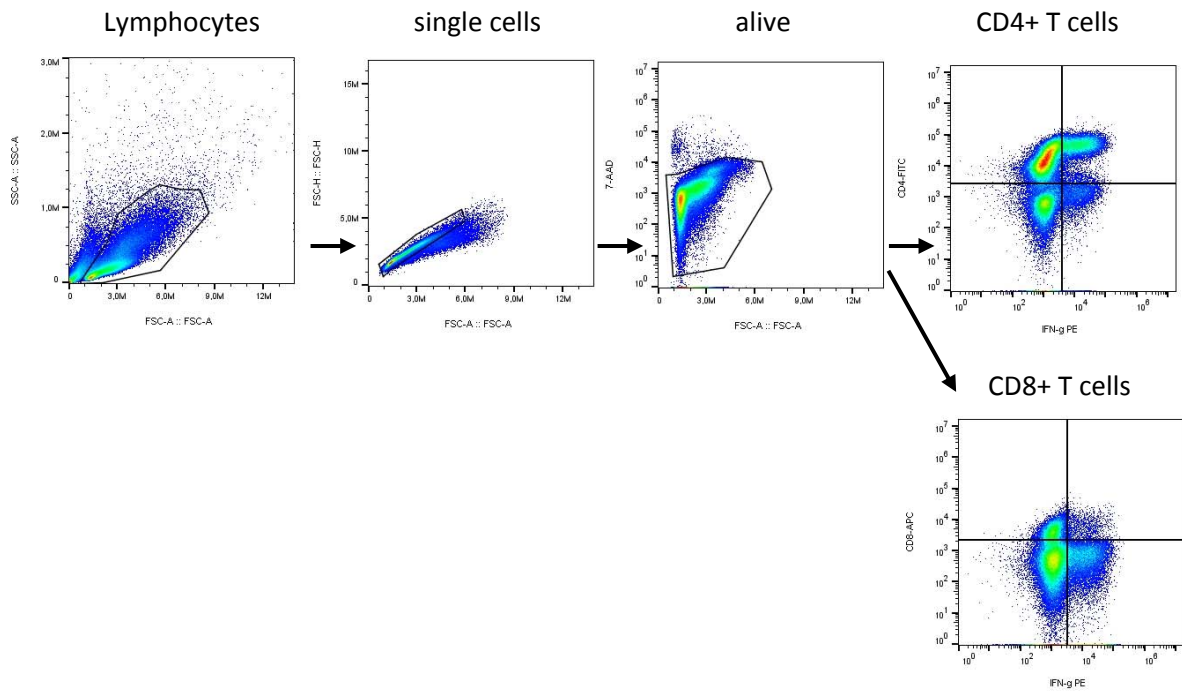

Supplementary figure 2: Representative gating strategy for detection of IFN-g secreting T cells. First, lymphocytes were gated according to their scatter properties, followed by FSC-area (A) vs FSC-height (H) for single cell gating. 7-AAD negative cells were then gated to exclude dead cells. Further, IFN-g producing CD4+ T cells and CD8+ T cells were identified by plotting IFN-PE vs CD4-FITC and CD8-APC, respectively.

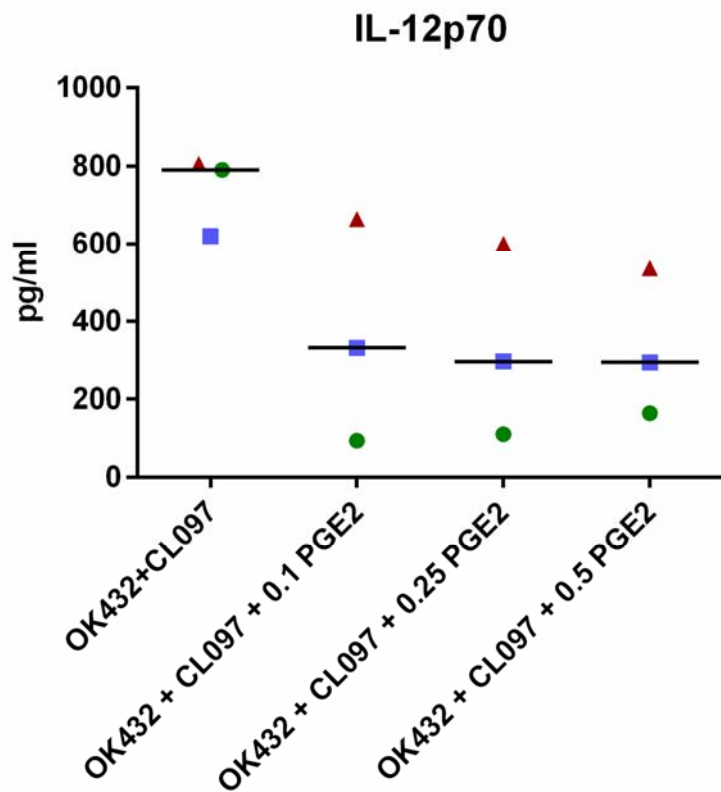

Supplementary figure 3: Effect on IL-12p70 secretion of different amounts of PGE2 in the OK432 cocktail. OK432 + CL097: DC matured with 0.1 KE/ml OK432 and CL097; OK432 + CL097 + 0.1 PGE2: DC matured with 0.1 KE/ml OK432, CL097 and 0.1  $\mu\text{g/ml}$  PGE<sub>2</sub>; OK432 + CL097 + 0.25 PGE2: DC matured with 0.1 KE/ml OK432, CL097 and 0.25  $\mu\text{g/ml}$  PGE<sub>2</sub> OK432 + CL097 + 0.5 PGE2: DC matured with 0.1 KE/ml OK432, CL097 and 0.5  $\mu\text{g/ml}$  PGE<sub>2</sub>. The symbols represent three different donors, median is indicated by a line.
